1 ***Ex vivo* infection of human skin with herpes simplex virus 1 reveals mechanical wounds**  
2 **as insufficient entry portals via the skin surface**

3 Nydia De La Cruz<sup>1\*</sup>, Maureen Möckel<sup>1\*</sup>, Lisa Wirtz<sup>1,3\*</sup>, Katharina Sunaoglu<sup>1</sup>, Wolfram  
4 Malter<sup>4</sup>, Max Zinser<sup>5</sup>, and Dagmar Knebel-Mörsdorf<sup>1,2</sup>

5  
6 <sup>1</sup>Center for Biochemistry, <sup>2</sup>Department of Pediatrics, University Hospital Cologne and Faculty  
7 of Medicine, University of Cologne, Germany, <sup>3</sup>Cologne Excellence Cluster on Cellular Stress  
8 Response in Aging-associated Diseases, University of Cologne, Germany, <sup>4</sup>Department of  
9 Gynecology and Obstetrics, University Hospital Cologne and Faculty of Medicine, University  
10 of Cologne, Germany, <sup>5</sup>Department of Plastic, Reconstructive and Aesthetic Surgery,  
11 University Hospital Cologne and Faculty of Medicine, University of Cologne, Germany

12  
13 \*these authors contributed equally to this work

14  
15  
16  
17  
18  
19  
20  
21  
22 Corresponding author: Dagmar Knebel-Mörsdorf

23 Center for Biochemistry and Department of Pediatrics, University of Cologne

24 Joseph-Stelzmann-Strasse 52, 50931 Köln, Germany

25 Phone: +49-221 86694; Fax: +49 221 478 6977; Email: [dagmar.moersdorf@uni-koeln.de](mailto:dagmar.moersdorf@uni-koeln.de)

26 **Abstract**

27 Herpes simplex virus 1 (HSV-1) enters its human host via the skin or mucosa. The open  
28 question is how the virus invades this highly protective tissue *in vivo* to approach its receptors  
29 in the epidermis and initiate infection. Here, we performed *ex vivo* infection studies in human  
30 skin to investigate how susceptible the epidermis and dermis are to HSV-1 and whether  
31 wounding facilitates viral invasion. Upon *ex vivo* infection of complete skin, only sample edges  
32 demonstrated infected cells. After removal of the dermis, HSV-1 efficiently invaded the basal  
33 layer, and from there, gained access to suprabasal layers supporting a high susceptibility of the  
34 epidermis. In contrast, only single infected cells were detected in the papillary layer of the  
35 separated dermis. Interestingly, after wounding, nearly no infection of the epidermis was  
36 observed via the skin surface. However, if the wounding of the skin samples led to breaks  
37 through the dermis, HSV-1 infected mainly keratinocytes via the wounded dermis. The  
38 application of latex beads revealed only occasional entry via the wounded dermis, however,  
39 facilitated penetration via the wounded skin surface. Thus, we suggest that the wounded human  
40 skin surface allows particle penetration but still provides barriers that prevent HSV-1 invasion.

41

42

43

44

45

46

47

48

49

50

## 51 **Introduction**

52 Herpes simplex virus 1 (HSV-1) is a prevalent human pathogen that can cause various  
53 infections and remains latent in their host for life. During primary infection, HSV-1 invades  
54 mucosal surfaces or abraded skin and replicates largely in the epidermis, which is followed by  
55 latent infection of sensory neurons where the virus can be reactivated to cause lesions at or near  
56 the site of initial infection. As the extent of primary and recurrent infections is largely a function  
57 of the host's immune status, severe HSV-1 infections can occur in immunocompromised hosts  
58 and newborns. Patients with skin lesions are predisposed to primary and recurrent HSV-1  
59 infections indicating that the virus needs to overcome skin barriers for efficient infection.

60 After penetration of the tissue, HSV-1 entry requires the interaction of multiple viral  
61 glycoproteins with host receptors (Heldwein and Krummenacher, 2008). Upon attachment to  
62 heparan sulfate proteoglycans on the cell surface, the viral glycoprotein gD interacts with its  
63 host receptors, which in turn initiates the fusion of the viral envelope with cellular membranes  
64 (Connolly et al., 2021). The primary gD receptors for HSV-1 on human cells are the cell-cell  
65 adhesion protein nectin-1 and herpesvirus entry mediator (HVEM), a member of the tumor  
66 necrosis factor receptor superfamily (Montgomery et al., 1996; Geraghty et al., 1998). Receptor  
67 interactions are well studied in cultured cells, however, we know less about their relevance for  
68 viral entry in human skin and mucosa, and about the conditions under which the receptors are  
69 accessible *in vivo*.

70 In general, the epidermis as the outermost layer of the skin provides efficient barriers which  
71 prevent water loss, exclude toxins and pathogens, resist mechanical stress and participate in  
72 immune responses (Simpson et al., 2011). The initial epidermal barriers towards pathogens  
73 include chemical barriers based on antimicrobial peptides, and a physical protection based on  
74 lipid sealed cell-cell contacts in the uppermost, cornified layer. These barriers in the outer shield  
75 of the epidermis provide an outside-in barrier function. The integrity of the underlying viable  
76 epidermal layers provides a further protective physical barrier mediated by cell adhesion  
77 molecules. Key players are the tight junction (TJ) proteins which are restricted to the granular  
78 layer, the uppermost nucleated epidermal layer. TJs control the paracellular transport of  
79 molecules and thereby also form an inside-out barrier. How HSV-1 bypasses the epidermal  
80 barriers to target its receptors, either during primary or recurrent infection, is poorly understood.  
81 In order to dissect the relevance of the physical barrier functions for HSV-1 infection, we  
82 established an *ex vivo* infection model of murine skin (Petermann et al., 2009; Rahn et al.,  
83 2015a). While murine epidermal sheets are highly susceptible to HSV-1, murine total skin

84 samples are protected against *ex vivo* infection confirming that the virus cannot penetrate via  
85 the apical skin surface (Rahn et al., 2015b). Even after removal of the cornified layer, no  
86 infected cells were observed (Rahn et al., 2017). Next to the cornified layer, functional TJs can  
87 also interfere with the efficiency of HSV-1 entry (Rahn et al., 2017).

88 Here, we explored the impact of physical skin barriers in human skin by *ex vivo* infection to  
89 identify the conditions under which HSV-1 can invade the tissue. Only after removal of the  
90 dermis from human skin samples and infection of the epidermal sheets was efficient infection  
91 detected in basal and suprabasal keratinocytes. Upon wounding, viral invasion was not  
92 observed via the skin surface but only when wounds crossed the dermis so that the virus gained  
93 access to keratinocytes via the dermal layer. Our results demonstrate that mechanical wounds  
94 of the skin surface do not provide *ad hoc* entry portals for HSV-1. Wounded skin samples that  
95 allowed entry via a damaged dermis and basement membrane support, however, that  
96 mechanical wounding can be sufficient for successful *ex vivo* infection with HSV-1.

97

## 98 **Results**

99 ***Ex vivo* infection of human skin.** To investigate the susceptibility of human skin to HSV-1,  
100 we began with *ex vivo* infection of total human skin samples by submerging them in virus  
101 suspension (Fig. 1a). We determined viral entry in individual cells by visualizing the very early  
102 expressed viral protein ICP0 to identify primary entry portals. Once the viral genome is released  
103 into the nucleus, ICP0 first localizes in the nucleus and then relocates to the cytoplasm during  
104 later infection, indicating viral replication (Petermann et al., 2009; Lopez et al., 2001). Thus,  
105 punctate nuclear ICP0 staining visualizes the completion of successful viral entry and  
106 cytoplasmic ICP0 indicates the onset of infection (Fig. 1b, c). Analyses of infected skin samples  
107 (n=10) revealed no ICP0-expressing cells until 16 (n=7) and 24 (n=9) hours p.i., however, only  
108 at the sample edges (Fig. 1b). Staining of collagenVII marked the basement membrane and  
109 demonstrated the loss of tissue integrity at the infected sample edges over time (Fig. 1b). After  
110 infection, the dermis was separated from the epidermis to visualize the highly susceptible  
111 keratinocytes at the edges in whole mount preparations (Fig. 1a, c). Whereas basal keratinocytes  
112 directly at the edge showed cytoplasmic ICP0 pointing to viral replication, the adjacent basal  
113 cells demonstrated nuclear ICP0 suggesting virus spreading (Fig. 1c). In contrast to the  
114 keratinocytes, we observed infection of dermal cells neither at the sample edges (Fig. 1b) nor  
115 at the bottom of the dermis. These results confirmed the efficient barrier function of the skin  
116 surface and revealed infection only in keratinocytes at the sample edges.

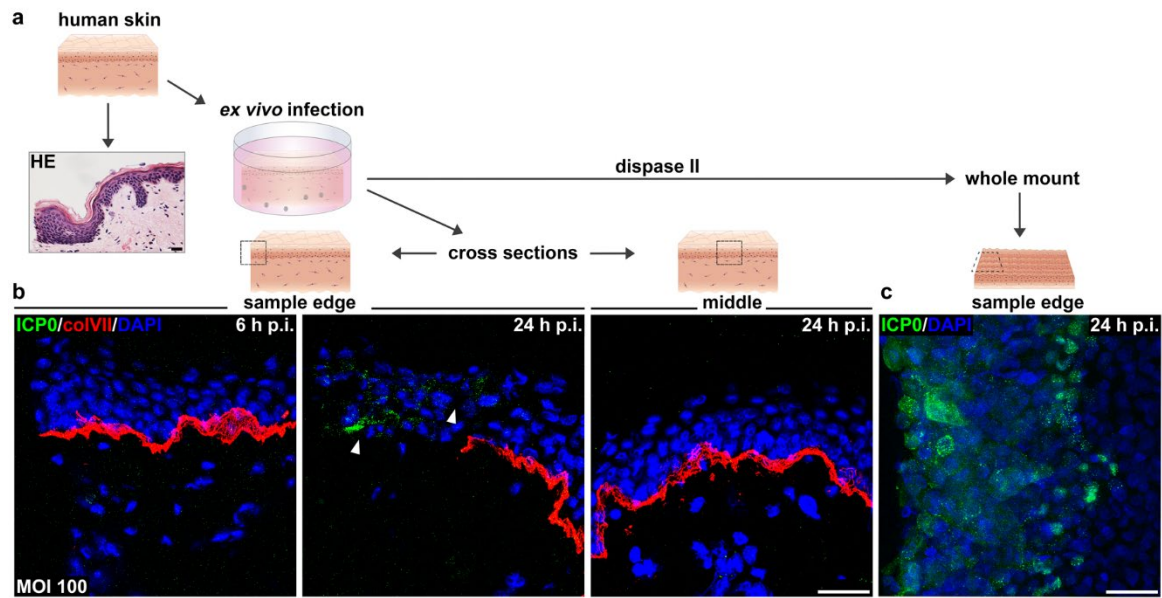

117

118 **Figure 1. HSV-1 entry in human skin only at the sample edges.** (a) Scheme illustrating *ex vivo*  
119 infection and analyses of human total skin samples. HE-stained section visualizes a sample edge prior  
120 to incubation. (b) Immunostainings of representative cross sections of breast skin (n=10) infected with  
121 100 PFU/cell show ICP0-expressing cells (green) at sample edge only at 24 hours p.i. (arrowheads). (c)  
122 Whole mount prepared after separation of the dermis from infected total breast skin demonstrates  
123 cytoplasmic ICP0 in cells of the basal epidermal layer at sample edge and nuclear ICP0 in cells closer  
124 to the middle of the epidermis. CollagenVII (colVII) (red) depicts the basement membrane, DAPI (blue)  
125 serves as nuclear counterstain. Bars=25 μm.

126

127

128 **Susceptibility of human epidermal sheets to HSV-1 and viral spreading to suprabasal**

129 **layers in the absence of viral replication.** To address the susceptibility of the epidermis to

130 HSV-1 in detail, we *ex vivo* infected epidermal sheets after removal of the dermis (Fig. 2a).

131 Single cells with nuclear ICP0 were detected in the basal layer of 18 samples already at 3 hours

132 p.i. (Fig. 2d). The number of infected cells increased at 6 hours p.i. (n=14) (Fig. 2d), and in

133 many samples (n=12), areas with nearly all basal keratinocytes infected were observed. At 9

134 hours p.i., infected cells started to appear in the suprabasal layers of most samples (n=10) in

135 addition to rather complete infection of the basal layer (Fig. 2d, e). Quantification of the ICP0

136 signals in the basal layer of 5 skin samples illustrates the increased susceptibility until 9 hours

137 p.i. (Fig. 2f). As a control, stainings of cleaved caspase 3 (cc3) confirmed the viability of nearly

138 all basal keratinocytes although in less infected areas, single cc3-positive cells were found (Fig.

139 2e). The distribution of infected cells in the suprabasal layers was depicted by staining loricrin

140 as marker for terminally differentiated cells in the granular layer. The number of infected cells

141 in the suprabasal layer increased at 12 hours p.i., while some upper granular cells expressing

142 ICP0 were observed only at 24 hours p.i. (Fig. 2d). At least in some areas of the epidermal

143 sheets, infection for 24 hours resulted in cytopathic effects (CPE) which may facilitate viral  
144 penetration even in the granular layer (Fig. 2d). Susceptibility of all nucleated epidermal layers  
145 to HSV-1 in human epidermis also occurs in murine epidermis (Petermann et al., 2015; Rahn  
146 et al., 2015b).

147 To distinguish between spreading of viral progeny to suprabasal cells and facilitated penetration  
148 of input virus in the epidermis during initial infection, we inhibited HSV-1 replication by  
149 phosphonoacetic acid (PAA). The successful block of viral replication is visualized by the lack  
150 of cytoplasmic translocation of ICP0 that is retained in the nucleus (Lopez et al., 2001). Upon  
151 infection of epidermal sheets for 9 hours, comparable numbers of basal cells with nuclear ICP0  
152 were observed in the presence and absence of PAA (Fig. 2g). Interestingly, at 12 hours p.i.  
153 some nuclear ICP0-expressing cells were detected in the suprabasal layers in all samples in  
154 addition to the infected basal cells when PAA was present (Fig. 2g). At 24 hours p.i. the number  
155 of suprabasal cells with nuclear ICP0 increased and even in the granular layer, nuclear ICP0-  
156 expressing cells were found upon PAA-treatment; in the absence of PAA, all basal and  
157 suprabasal cells showed cytoplasmic ICP0 as expected (Fig. 2g). Surprisingly, we still observed  
158 some areas with disturbed morphology at 24 hours p.i. when viral replication was blocked (Fig.  
159 2g), while tissue integrity was completely maintained after 24 hours incubation in virus-free  
160 medium (Fig. 2d). In summary, the inhibitor studies demonstrate that HSV-1 can reach  
161 suprabasal cells in the absence of viral replication at 12 hours p.i. supporting that the viral  
162 particles are able to penetrate in deeper tissue layers via the basal layer. Suprabasal ICP0  
163 expression at 24 hours p.i. however, may be related to the tissue damage occurring not only in  
164 the presence but also in the absence of viral replication.

165 To explore whether virus-induced tissue permeability is involved in facilitated viral entry, we  
166 analyzed how well fluorescently-labeled latex beads (500 nm) penetrated the epidermal layers.  
167 While beads were present in basal cells after 3 and 6 hours incubation (data not shown), beads  
168 in some suprabasal cells were observed after 9 and 12 hours (Fig. 2h). However, there was no  
169 further increase of beads in suprabasal cells after 12 hours (Fig. 2h). As already observed in  
170 murine epidermis (Rahn et al., 2015b), incubation of human epidermis in medium for 24 h  
171 resulted in an extensive relocalization of TJs to the basal layer as visualized by occludin staining  
172 (Fig. 2d, h), which was not found at 24 hours after infection because of virus-induced  
173 morphology disturbance (data not shown). This remodeling of TJs was not yet visible after 9  
174 to 12 hours thus allowing beads to be internalized in suprabasal cells only until 12 hours (Fig.  
175 2h).

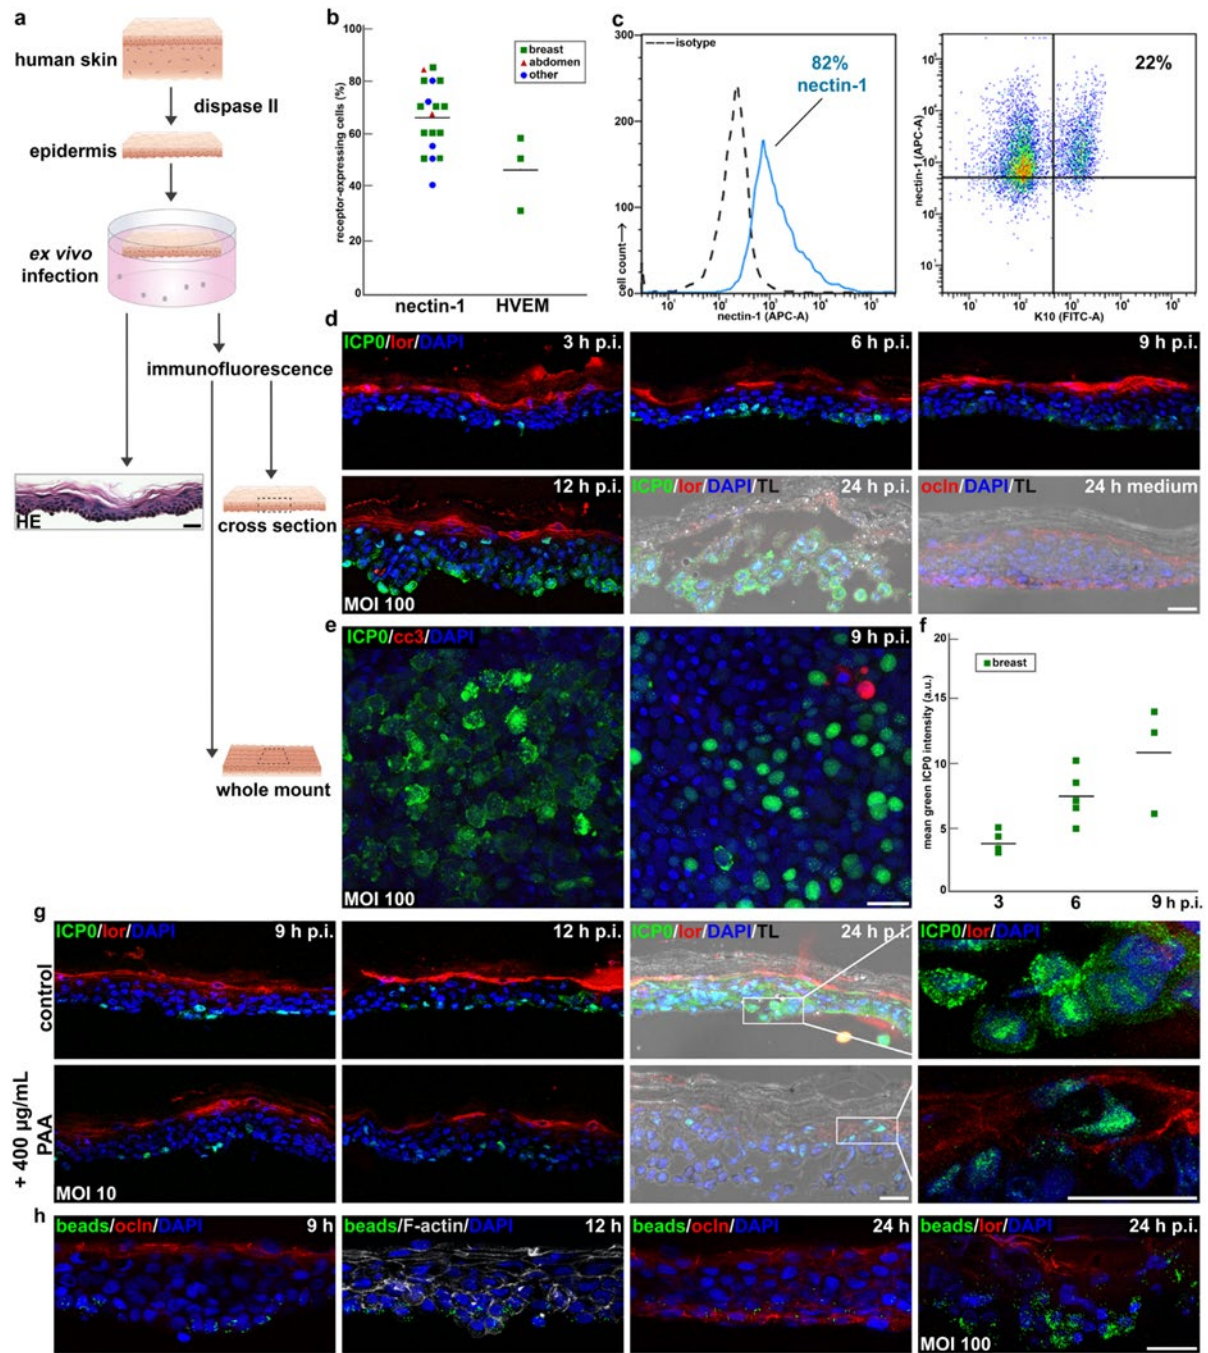

176

177 **Figure 2. HSV-1 entry and uptake of latex beads in human epidermis.** (a) Infection and  
 178 analyses of epidermis. (b) Flow cytometry shows nectin-1- or HVEM-positive epidermal cells.  
 179 (c) Nectin-1/K10-positive epidermal cells from breast sample. (d) Representative time course  
 180 of ICP0-expressing (green) basal and suprabasal cells in abdominal epidermis (n=3); lorixin  
 181 (lor) (red) depicts granular layer; occludin (ocln) (red) visualizes TJs in basal layer after 24  
 182 hours incubation. (e) Whole mount of breast skin with cytoplasmic ICP0; cleaved caspase 3  
 183 (cc3)-positive cells (red) only in area with nuclear ICP0. (f) Increased infection efficiency in  
 184 breast skin over time. (g) Infection of PAA-treated abdominal epidermis results in nuclear ICP0  
 185 in basal and suprabasal cells. (h) Beads (green) uptake in suprabasal cells of abdominal  
 186 epidermis after 12, no increase after 24 hours. Enhanced internalization of beads in suprabasal  
 187 cells after infection. F-actin (white) depicts cell morphology. TL= transmission light. Bars=25  
 188 µm.

189 When epidermal sheets were simultaneously infected and incubated with beads, the access of  
190 beads to suprabasal including granular cells was strongly enhanced (Fig. 2h). Thus, we  
191 conclude that viral access to suprabasal layers depends largely on virus-induced tissue damage.  
192 The infection studies indicated that HSV-1 could enter all nucleated keratinocytes in the human  
193 epidermis supporting that the virus gained access to ubiquitously expressed entry receptors.  
194 Previously, we found that HSV-1 entry in murine epidermis strongly depends on nectin-1, but  
195 HVEM can potentially replace nectin-1 as receptor (Petermann et al., 2015). Thus, we  
196 investigated to which extent nectin-1 and HVEM were expressed on epidermal cells prepared  
197 from human skin, which originated from 39 to 86 year-old patients and included mainly breast  
198 (n=11) but also abdominal skin (n=2) and skin from other areas (n=4). The skin analyses by  
199 flow cytometry revealed nectin-1 on approximately 40% to 85% of the analyzed epidermal cells  
200 (Fig. 2b). The variation of nectin-1 expression correlated neither with age (data not shown) nor  
201 skin area. Co-staining of nectin-1 and keratin-10 (K10), a marker for differentiating  
202 keratinocytes, demonstrated that nectin-1 was highly expressed on basal but also differentiating  
203 keratinocytes as from 82% nectin-1-positive cells, a subpopulation of approximately 22% was  
204 nectin-1- and K10-positive indicative for suprabasal cells (Fig. 2c). This finding correlates with  
205 viral susceptibility of suprabasal cells over time. Interestingly, we observed no increased  
206 susceptibility in those epidermal sheets with very high nectin-1 expression ( $\geq 70\%$ ). In addition,  
207 the alternative receptor HVEM was expressed on approximately 35% to 60% of the basal cells  
208 suggesting that both nectin-1 and HVEM could act as entry receptors (Fig. 2b).

209 **Susceptibility of human dermis to HSV-1.** As no infected dermal cells were observed upon  
210 infection of total human skin samples, we investigated whether the dermis is susceptible to  
211 HSV-1 after separation from the epidermis by dispase II treatment (Fig. 3a). To demonstrate  
212 whether infection led to tissue alterations, we visualized the organization of collagen fibrils by  
213 SHG microscopy which demonstrated no obvious changes of the collagen matrix after *ex vivo*  
214 infection for 24 hours (Fig. 3b). Interestingly, upon infection we detected no ICP0-expressing  
215 cells at 6 and 12 hours p.i. Only at 16 hours p.i. were single infected cells found in the most  
216 apical part of the papillary dermis with no increase at 24 hours p.i. (Fig. 3c). Co-staining of  
217 ICP0 and the leucocyte-specific surface antigen CD45 (Thomas, 1989) revealed no preferred  
218 infection of immune cells supporting that dermal fibroblasts represent the few infected cells  
219 (Fig. 3c). This rather low infection efficiency is in contrast to murine dermis, where most of the  
220 apical papillary dermis is infected at 20 hours p.i. (Wirtz et al., 2020).

221



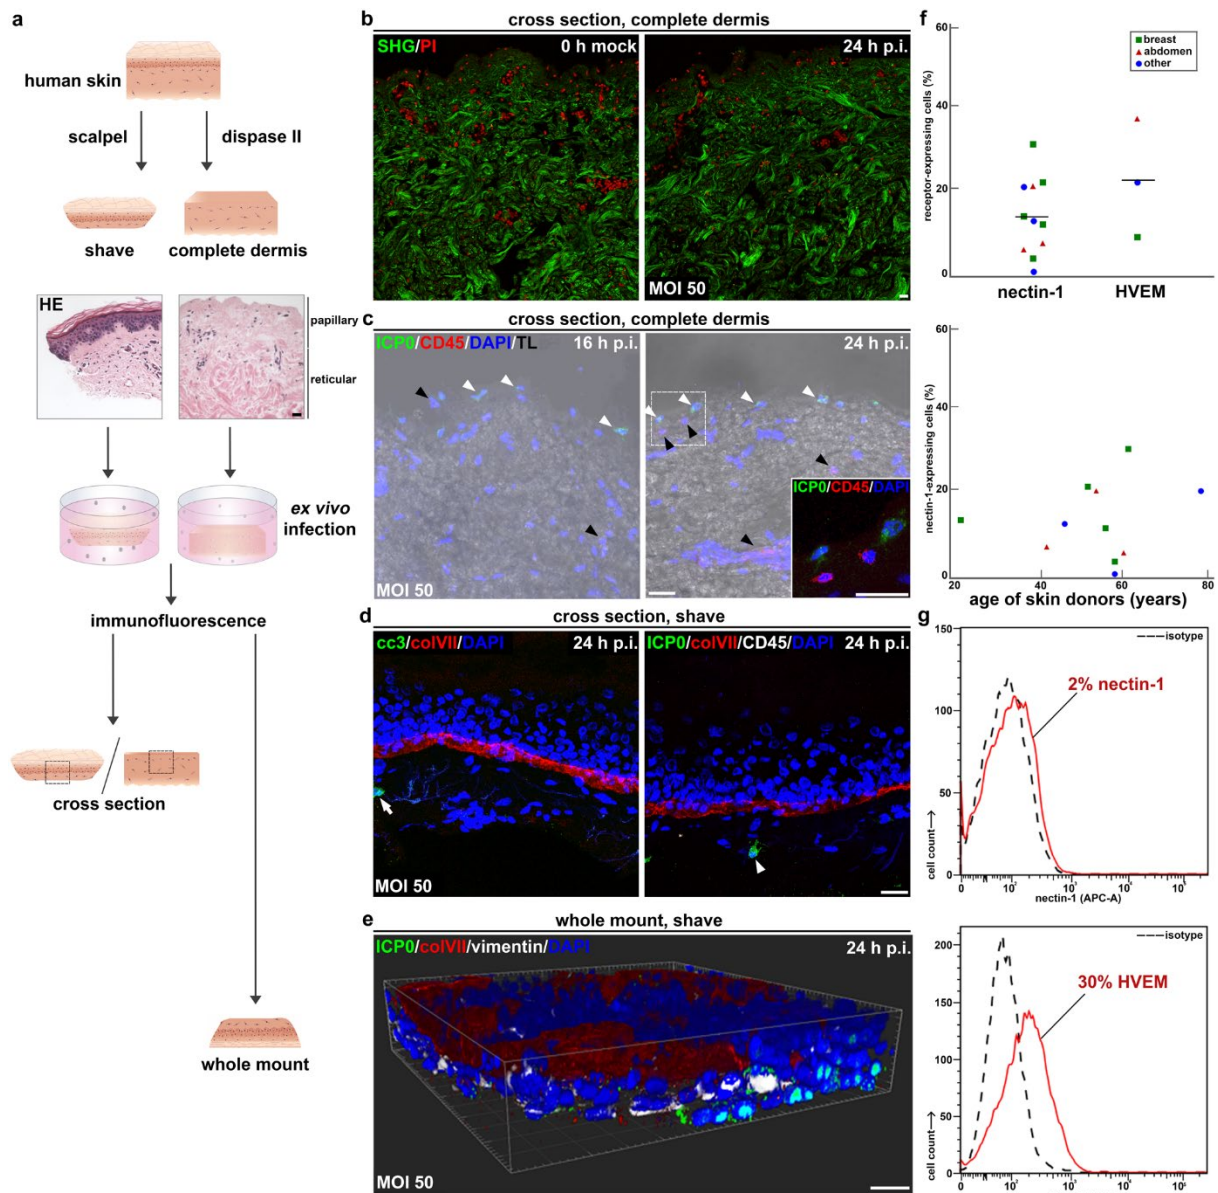

222

223 **Figure 3. Insufficient HSV-1 entry in human dermis.** (a) Infection and analyses of skin  
 224 shaves and dermis. (b) Second harmonic generation (SHG) shows unchanged collagen structure  
 225 24 hours p.i. (c) Representative immunostaining of 9 samples shows single ICP0-expressing  
 226 cells (white arrowheads) in the papillary layer of abdominal dermis. No costaining of ICP0-  
 227 and CD45-positive (red) (black arrowheads) cells. (d) Single cc3-positive cell (arrow) and  
 228 single ICP0-expressing/CD45-negative cell (arrowhead) in dermal layer of abdominal shaves.  
 229 (e) 3D whole mount of infected shave visualizes vimentin-positive (white)/ICP0-expressing  
 230 fibroblasts and infected basal keratinocytes at sample edge. Bars=25  $\mu$ m (f) Flow cytometry  
 231 demonstrates nectin-1- or HVEM-positive cells isolated from complete dermis; nectin-1  
 232 expression at different ages. (g) Nectin-1- or HVEM-positive cells from abdominal skin shave  
 233 shown in d and e.  
 234

235 To correlate the low infection efficiency with receptor presence, we investigated surface  
 236 expression of nectin-1 by flow cytometry. The analyses of dermal sheets (n=11) revealed  
 237 variable nectin-1 expression ranging from undetectable to 30% of dermal cells, which

238 correlated neither with skin area nor age (Fig. 3f). Detectable levels of nectin-1 transcripts were  
239 found in all dermal sheets (data not shown). Furthermore, we observed surface expression of  
240 HVEM on ca. 22% of dermal cells (Fig. 3f). These results suggest that the minor expression of  
241 nectin-1 and HVEM on dermal cells contributes to the low infection efficiency. To explore  
242 whether removal of the reticular dermis facilitates viral access to cells in the papillary dermis,  
243 we used skin shaves for *ex vivo* infection studies (Fig. 3a). After removal of the papillary dermis  
244 from skin shaves, we observed approximately 2% nectin-1- and 30% HVEM-expressing dermal  
245 cells (Fig. 3g). Upon infection of these shaves, single ICP0-expressing cells were found at 16  
246 and 24 hours p.i. in the papillary dermis, which did not represent immune cells as shown by  
247 negative CD45 staining (Fig. 3d). Control staining of cc3 confirmed the viability of the dermal  
248 cells (Fig. 3d). As expected at 24 hours p.i., ICP0-expressing cells were evident at the edges of  
249 the skin shaves and mostly represented keratinocytes although co-staining of vimentin revealed  
250 also some infected dermal cells (Fig. 3e). Taken together, viral access to the papillary dermis  
251 of skin shaves was still rather inefficient.

252 **HSV-1 entry and latex beads uptake in wounded human skin.** To address whether  
253 dysfunctional physical barriers of the skin facilitate HSV-1 entry, we applied various protocols  
254 to wound human skin samples. Immediately after wounding, the samples were infected by  
255 submerging in virus suspension or topical application (Fig. 4a). Wounding approaches such as  
256 scalpel cuts and sandpaper revealed no ICP0-expressing cells even at 24 hours p.i. (data not  
257 shown). We thus used a more reproducible method and applied microneedles, which generated  
258 lesions providing viral access to the various epidermal layers and the dermis. We *ex vivo*  
259 infected skin samples (n=14) from various areas and ages immediately after wounding.  
260 Histological sections revealed open lesions immediately after wounding (Fig. 4a), but rarely  
261 after incubation in medium suggesting that the lesions fold back after incubation. However,  
262 lesions were visible by the discontinuous basement membrane as visualized by collagenVII  
263 staining (Fig. 4b). Surprisingly, no infected cells were detected at wounded areas of 13 samples  
264 at 16 and 24 hours p.i. (Fig. 4b), but mostly only at sample edges as observed in unwounded  
265 skin (Fig. 1b). The viability of cells in the wounded area was confirmed by cc3 staining (Fig.  
266 4b). Only in one skin sample, ICP0-expressing cells were found in a lesion (Fig. 4c) suggesting  
267 that an infected wound is a very rare event. We next infected wounded skin shaves taken from  
268 abdominal skin (n=3) (Fig. 4d). Skin shaves included the complete epidermis with a small  
269 dermal layer so that the microneedle-induced lesions completely penetrated the epidermis as  
270 well as the dermal layer. Again, we observed infected cells at the edges of most samples where

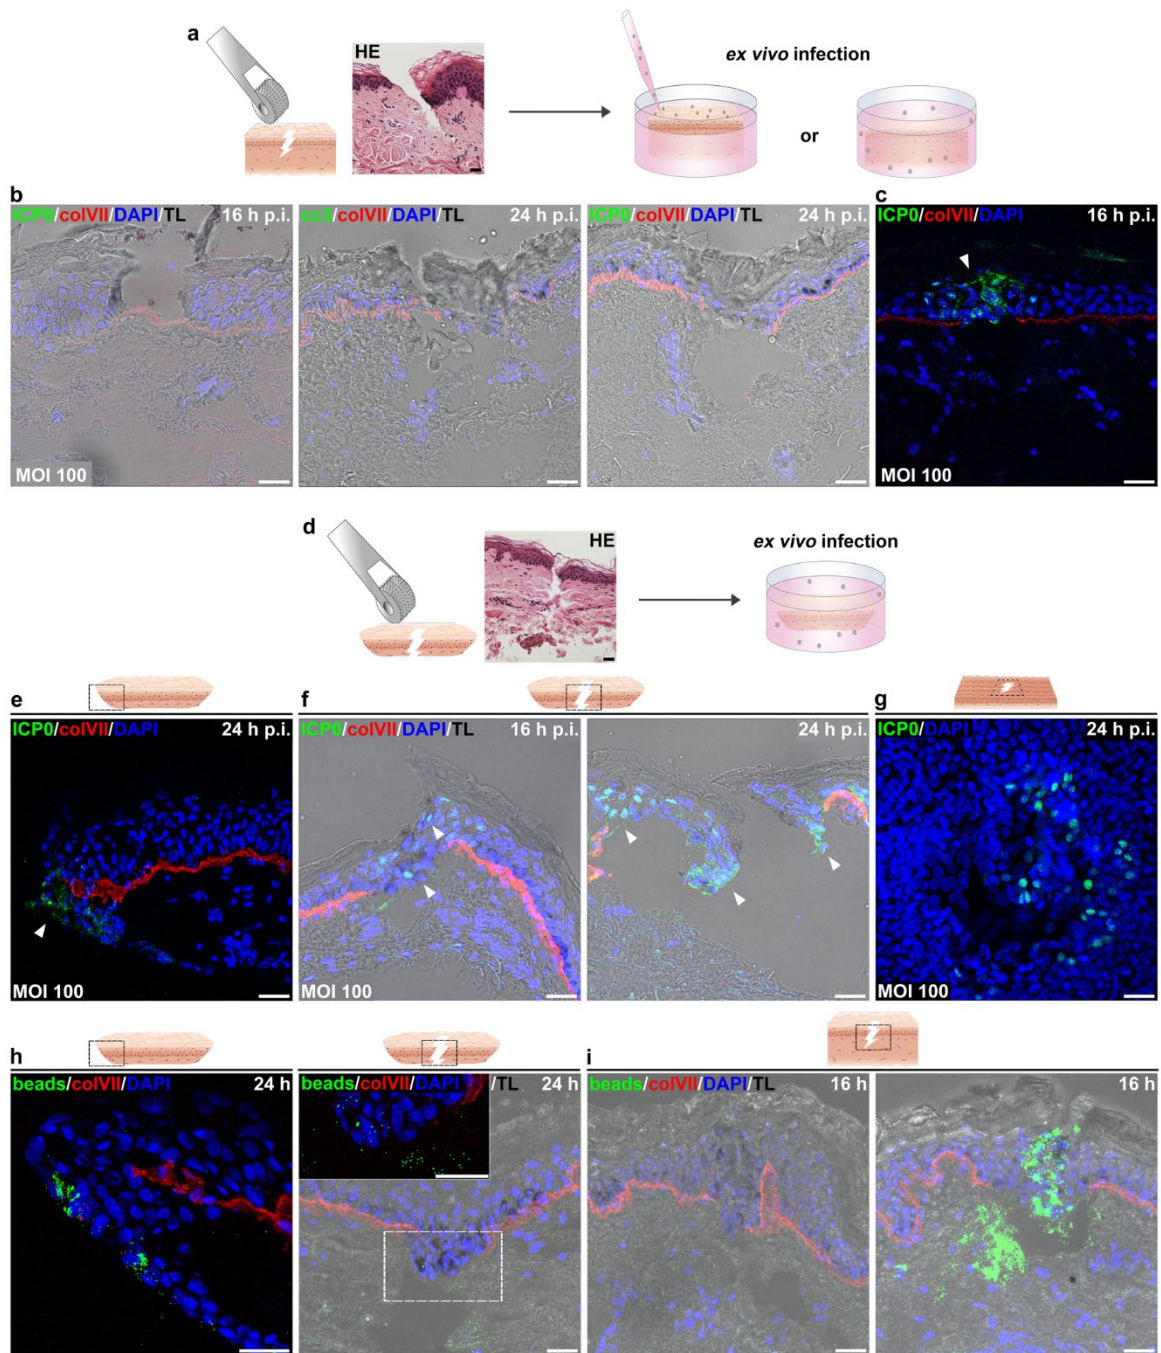

271

272 **Figure 4. HSV-1 entry only in wounded human skin shaves but not in lesions of total skin.**

273 (a, d) Wounding, infection, and analyses of total skin and skin shaves. HE-stained sections

274 visualize lesions prior to incubation. (b) Various lesions in total abdominal skin show neither

275 ICP0- nor cc3-positive cells indicating non-infected, viable cells. (c) Wounded breast skin

276 shows ICP0-expressing keratinocytes in area with discontinuous collagenVII staining. (e)

277 ICP0-expressing cells (arrowheads) at edge, or (f) closed and partly open lesions of abdominal

278 skin shave. (g) Whole mount after separation of dermal layer shows ICP0-expressing basal cells

279 in wounded area of abdominal skin. (h) Internalized beads at edge and single beads in partly

280 open lesion of abdominal skin shave. (i) No beads in closed and clustered beads in partly open

281 lesion of total abdominal skin. Bars=25  $\mu$ m

282

283 tissue integrity was frequently lost at 24 hours p.i. (Fig. 4e). In contrast to total wounded skin,  
284 however, we easily detected infected cells in the wounded areas at 16 hours p.i. with increasing  
285 numbers at 24 hours p.i. (Fig. 4f). These infected cells rarely included ICP0-expressing  
286 fibroblasts, but mostly represented basal keratinocytes as visualized by whole mount  
287 preparations after removal of the dermal layer (Fig. 4g).

288 Taken together, wounding by microneedles revealed that physical lesions did not allow invasion  
289 of HSV-1 via the skin surface but when the lesions crossed the dermal layer in skin shaves,  
290 HSV-1 gained access to the epidermis. The open question is why the virus particles cannot  
291 penetrate the epidermis via the apical surface of the wounds. To address whether the lesions in  
292 total skin are insufficient to allow penetration of particles in general, we investigated whether  
293 latex beads (500 nm) can invade via lesions. Internalized beads were easily found at the edges  
294 of skin shaves after 24 hours incubation; however, only a limited number of beads were present  
295 in the wounded area of shaves (Fig. 4h). In contrast, we observed clusters of internalized beads  
296 in partly open lesions of total skin after 16 hours incubation (Fig. 4i). In more closed lesions,  
297 only identified by discontinuous collagen VII staining, nearly no beads were visible (Fig. 4i).  
298 This indicates that some lesions in total skin allow the strong penetration of beads via the  
299 wounded surface. The clustered beads might result from the retention of the particles in these  
300 lesions thus allowing enhanced uptake. In contrast, the beads can escape in lesions of shaves as  
301 they are open through the apical surface and the dermis.

302 In summary, we conclude that lesions in total skin provide no entry portal for HSV-1 although  
303 beads (500 nm) that are larger than virus particles (200 nm) can penetrate in cells of the  
304 wounded area. When HSV-1 can gain access to the lesions via the dermal site of skin shaves,  
305 however, infection of the wounded area is possible.

306

## 307 **Discussion**

308 Viral entry is mostly well-studied with respect to virus-receptor interactions, but the missing  
309 link is to understand how the virus invades tissue to initiate infection. Here, we explored the  
310 conditions that allow HSV-1 to reach its host receptors in tissue. Our *ex vivo* infection studies  
311 in human skin samples demonstrated susceptible basal as well as suprabasal keratinocytes  
312 while entry in dermal fibroblasts was rarely detected. The high susceptibility of keratinocytes,  
313 however, was only achieved after separation of the dermis from the epidermis which allowed  
314 direct viral access to basal keratinocytes in the absence of the basement membrane. In contrast,  
315 HSV-1 infection of the dermis in the absence of the basement membrane only resulted in rare

316 infected cells in the papillary dermis. A possible explanation could be the low surface  
317 expression of nectin-1 and HVEM on cells in the human dermis. In juvenile murine dermis, we  
318 previously observed nectin-1 on ca. 40% of the dermal cells and found more infected cells than  
319 in human dermis (Wirtz et al., 2020). During aging, however, nectin-1 expression drops while  
320 HVEM remains high in old murine dermis which correlates with delayed infection efficiency  
321 (Wirtz et al., 2020) supporting a link of receptor presence and infection efficiency. Furthermore,  
322 we speculate that the ECM provides a barrier that prevents the virus from efficiently reaching  
323 receptors on dermal fibroblasts. In human epidermis, we found a correlation of highly  
324 susceptible basal keratinocytes and high nectin-1 expression. Although nectin-1 was also  
325 present on suprabasal cells, how well the receptor is distributed in each of the suprabasal layers  
326 is open for future investigation.

327 To study how tissue integrity limits viral access to suprabasal layers after infection of epidermal  
328 sheets via the basal layer, we blocked viral replication to minimize virus-induced tissue damage.  
329 Intriguingly, the virus still entered granular cells over time. As some disturbed morphology also  
330 took place in the absence of viral replication, however, we assume that even early infection  
331 leads to some tissue damage including dysfunctional junctions and thereby offers access to  
332 receptors on upper granular cells. To further explore tissue permeability, we applied latex beads  
333 and observed internalized beads in suprabasal cells supporting that 500 nm particles can  
334 overcome junctions up to the upper granular layer. Simultaneous infection and incubation with  
335 beads, in turn, illustrates that virus-induced changes strongly enhance bead internalization in  
336 upper suprabasal cells. Taken together, our results suggest that HSV-1 readily accesses basal  
337 cells upon infection of epidermal sheets, then further viral invasion depends on virus-induced  
338 changes during early infection that even allow the virus to overcome the inside-out barrier  
339 formed by TJs.

340 Infection of total skin resulted in no viral penetration via the apical surface as expected. Infected  
341 cells were found at sample edges, which were first observed at 16 hours p.i. This was strongly  
342 delayed compared to epidermal sheets where infected basal cells were already observed at 3  
343 hours p.i. Based on stainings of the basement membrane, we assume that incubation in medium  
344 alters tissue integrity at the sample edges over time which then allows the virus to gain access  
345 to its receptors on keratinocytes.

346 The general assumption is that skin lesions can serve as entry portals for HSV-1 as the cell's  
347 status influences its plasma membrane dynamics which in turn might facilitate receptor  
348 accessibility. So far, mechanical wounding of human oral mucosa samples is insufficient for

349 HSV-1 invasion suggesting that further contributions, such as the biofilm of the oral cavity,  
350 play a role in viral entry *in vivo* (Thier et al., 2017). Microneedle-treatment of human abdominal  
351 skin was recently described to allow productive HSV-1 infection thus providing an infection  
352 model to study antiviral compounds (Tajpara et al., 2019). The emphasis of that study was to  
353 prepare skin samples which show the pathogenesis of HSV-1 four days after infection  
354 irrespective of the initial entry portal (Tajpara et al., 2019). We also applied microneedle-treated  
355 skin, however, the question focused on whether and how HSV-1 entered cells at lesions, thus  
356 we compared wounded total skin with skin shaves. Our finding is that the wounded area of  
357 lesions in total skin shows ICP0-expressing cells only very rarely, while infected cells were  
358 detected in skin shaves where the lesion penetrated the epidermis as well as the dermis. Thus,  
359 we conclude that HSV-1 cannot enter the viable cells at lesions via the apical surface even when  
360 the basement membrane is disrupted but needs access to the basal keratinocytes via the  
361 wounded dermis. This conclusion is in line with the observations of Tajpara et al. (2019) who  
362 infected thin dermatome-cut skin submerged in medium supporting invasion via the dermal  
363 layer and the edges.

364 When we addressed whether the barriers restricting viral invasion via the wounded surface of  
365 total skin also hindered particle penetration, we surprisingly found clusters of internalized latex  
366 beads in some lesions but no beads in other more closed lesions. Both kinds of lesions harbored  
367 nearly no infected cells suggesting that wound closure does not interfere with viral invasion.  
368 Based on the observation that only beads but no virus particles can penetrate via the wounded  
369 surface, we assume that lesions in skin shaves and total skin provide different barrier functions  
370 to efficient viral invasion which still have to be identified. These different barriers might  
371 involve the variable accessibility and/or distribution of the receptor nectin-1 on cells in lesional  
372 skin shaves and total skin, respectively.

373 In summary, we found no viral entry via lesions in total skin although we demonstrated the high  
374 susceptibility of all epidermal layers and the cellular accessibility for latex beads. Sample edges  
375 only served as entry portals over time suggesting that tissue integrity loss has to precede  
376 successful viral penetration. Strikingly, the virus can enter epidermal cells once the wounds in  
377 thin skin samples allow access via the disrupted basement membrane while dermal cells showed  
378 a rather low susceptibility to HSV-1 (Fig. 5).

379

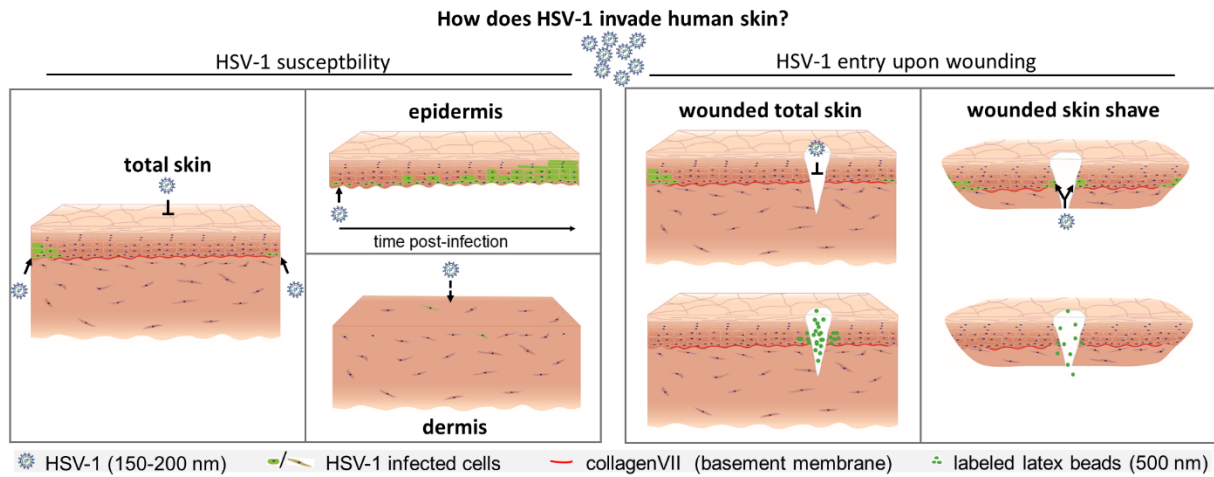

380

381 **Figure 5. Graphical summary.**

382

### 383 **Materials and Methods**

384 **Preparation of human skin.** Human breast (n=30) and abdominal skin (n=5) was received  
385 from patients undergoing breast and plastic surgery, respectively, while small skin biopsies  
386 (n=13) were derived from various skin areas. Immediately after surgery, skin samples with no  
387 pathological alterations were stored in DMEM/high glucose/GlutaMAX and prepared for  
388 infection. After removal of subcutaneous fat, samples were cut in pieces (total skin) or shave  
389 biopsies were taken including the epidermis and a thin dermal layer with an average thickness  
390 of 0.4 mm (skin shaves). Total skin and skin shaves were treated with a derma-  
391 roller/microneedles (1.5 mm length x 0.25 mm in diameter) (Lurrose) 5 times in 4 directions.  
392 Epidermal and dermal sheets were prepared after incubation overnight at 4°C with 4 U/ml  
393 dispase II (Roche) in PBS by gently separating dermis and epidermis each as intact sheets (Rahn  
394 et al., 2015a; Wirtz et al., 2020). All skin samples were incubated in DMEM/high  
395 glucose/GlutaMAX (Life Technologies) containing 10% FCS, penicillin (100 U/ml) and  
396 streptomycin (100 µg/ml). The analysis of viral susceptibility revealed no detectable  
397 difference among the various skin samples.

398 **Ethics statement.** Human skin specimens were obtained after informed consent from all  
399 patients. The study was approved by the Ethics Commission of the Medical Faculty, University  
400 of Cologne (approval no. 17-481).

401 **Virus.** Infection was performed with purified preparations of HSV-1 wt strain 17 as described  
402 (Schelhaas et al., 2003). The calculation of the virus dose was based on the estimated cell

403 number in the basal layer of the epidermis (ca.  $3 \times 10^5$  cells per 5- by 5-mm sheet) and in the  
404 superficial areas of the dermis (ca.  $2 \times 10^5$  cells per 4- by 4- mm surface area). Intact or  
405 microneedle-pretreated total skin and skin shaves were infected at 100 PFU/cell, dermal sheets  
406 at 50 PFU/cell, and epidermal sheets at 100 or 10 PFU/cell. The virus inoculum was added to  
407 the tissue samples at 37°C defining time point zero. Epidermal sheets were floating on virus-  
408 containing medium, while dermal sheets, total skin and skin shaves were submerged.

409 Viral replication was inhibited by adding PAA diluted in medium to a final concentration of  
410 400 µg/ml (Lopez et al., 2001). PAA was present throughout infection and H<sub>2</sub>O served as the  
411 solvent control.

412 **Marker uptake.** Sulfate-modified polystyrene, fluorescent orange latex beads (500 nm)  
413 (Sigma) served as a marker for penetration of particles in various skin samples. Total skin, skin  
414 shaves and epidermal sheets prepared from breast or abdominal skin were incubated with latex  
415 beads ( $2 \times 10^9$  beads/sample) for various times at 37°C. Samples were thoroughly washed three  
416 times and immediately embedded for preparation of cryosections.

417 **Histochemistry, immunocytochemistry and antibodies.** For cryosections, total skin, skin  
418 shaves, and epidermal or dermal sheets were embedded in OCT compound (Sakura), frozen,  
419 and cut into 8 µm (total skin, shaves, epidermal sheets) or 100 µm (dermal sheets) cross sections  
420 as described (Rahn et al., 2015a; Wirtz et al., 2020). For hematoxylin and eosin (HE) staining,  
421 samples were fixed with 3.4% formaldehyde overnight at 4°C, prepared as paraffin sections (8  
422 µm), and stained for 10 min with hemalum followed by counterstaining with eosin for 20  
423 seconds. HE stainings were used to assess the morphology of uninfected or infected tissue as  
424 well as of intact and microneedle-pretreated total skin/skin shaves.

425 For immunofluorescence, tissue sections of total skin, shaves and epidermis were fixed with  
426 1% formaldehyde for 10 min at RT, dermal sections and whole mount preparations of shaves  
427 and epidermis were fixed with 3.4 % formaldehyde overnight at 4°C and blocked as described  
428 (Rahn et al., 2015a; Wirtz et al., 2020). Only for occludin staining, epidermal sections were  
429 fixed with 4°C cold ethanol for 30 min and then with acetone (-20°C) for 3 min. Tissue sections  
430 of total skin, shaves and epidermis were incubated with primary antibodies overnight at 4°C  
431 followed by incubation with the species-specific AlexaFluor-conjugated secondary antibodies  
432 and DAPI for 45 min at RT. Epidermal whole mounts were incubated with primary antibodies  
433 overnight at RT and with the secondary antibodies and DAPI overnight at 4°C. Dermal sections  
434 and whole mounts of shaves were incubated with primary antibodies overnight at RT and with  
435 secondary antibodies and DAPI overnight at RT. The following primary antibodies were used:



436 mouse anti-ICP0 (monoclonal antibody 11060; 1:60) (Everett et al., 1993), mouse anti-  
437 collagenVII (1:500) (Santa Cruz Biotechnology), rabbit anti-cleaved caspase 3 (1:400) (Cell  
438 Signaling), rabbit anti-loricrin (1:1000) (Biolegend), rabbit anti-vimentin (1:400) (Cell  
439 Signaling), and mouse anti-CD45-CoraLite 488 (1:400) (Proteintech). CollagenVII staining of  
440 dermal and epidermal sections suggests the loss of the basement membrane after separation by  
441 dispase II treatment (data not shown). F-actin staining of epidermal sections was performed  
442 with phalloidin-Atto 565 (1:2000) (Sigma) for 45 min at RT to demonstrate the internalization  
443 of beads.

444 Second harmonic generation (SHG) microscopy was performed to analyze dermal collagen  
445 morphology by using an upright multiphoton microscope (TCS SP8 MP; Leica Microsystems)  
446 equipped with a Ti:Sa laser (Chameleon Vision II; Coherent), which was tuned to 1050 nm, as  
447 described previously (Do et al., 2018). Paraffin tissue sections co-stained with propidium iodide  
448 (PI) were placed on a mirror to improve forward directed signal detection. A 25x water  
449 immersion objective (NA 0.95, Leica Microsystems) was used and the two signals were  
450 recorded simultaneously by two non-descanned HyD detectors using a 525/50 bandpass filter  
451 for the SHG signal and a 585/40 bandpass filter for the fluorescent PI signal. LAS X software  
452 (Leica Microsystems) was used for laser scanning control and image acquisition.

453 Microscopy of tissue sections and whole mounts was performed using a Leica DM IRB/E  
454 microscope linked to a Leica TCS-SP/5 confocal unit. Images were assembled using Photoshop  
455 (Elements 2018; Adobe) and Illustrator (version CS2; Adobe). Images were analyzed using FiJi  
456 (version 2.0.0-rc-65/1.51s) (Schindelin et al., 2012) by measuring the mean green fluorescent  
457 intensity of three different areas per biological replicate. 3D visualization of a shave whole  
458 mount was generated with ImarisViewer (version 9.6.0, Imaris Bitplane) based on confocal z-  
459 stack acquisitions.

460 **Flow cytometric analysis.** Epidermal and dermal sheets were prepared from human breast and  
461 abdominal skin in addition to skin from other areas. Epidermal sheets were incubated with  
462 TrypLE Select (Life Technologies) or with enzyme-free cell dissociation solution (CDS)  
463 (Sigma), and processed as described (Petermann et al., 2015). HVEM expression on cells was  
464 detected only when cells were dissociated using enzyme-free CDS. After dissociation of the  
465 epidermal sheets by enzyme-free CDS, HE stainings of the remaining sheets demonstrated that  
466 the basal cells were detached indicating that HVEM expression could only be analyzed on basal  
467 cells. In contrast, dissociation of the epidermal sheets by TrypLE Select resulted in the  
468 dissociation of basal as well as suprabasal cells although to a slightly varying extent in the

469 different samples (data not shown). Cell suspensions prepared by TrypLE Select were incubated  
470 in PBS-5% FCS on ice for 30 min with mouse anti-nectin-1 (CK41; 1:100) (Krummenacher et  
471 al., 2000), and nectin-1 was visualized with anti-mouse IgG-Cy5 (1:100) (Jackson  
472 Immunoresearch Laboratories Inc.). After permeabilization with 0.2 % saponin, the cells were  
473 incubated in PBS-5% FCS on ice for 30 min with rabbit anti-K10 (1:1000) (Biolegend), and  
474 K10 was visualized with anti-rabbit AF488 (Life Technologies; 1:200). Cell suspensions  
475 prepared by enzyme-free CDS were kept in PBS-5% FCS and incubated on ice for 30 min with  
476 rabbit polyclonal anti-human HVEM (R140; 1:500) (Terry-Allison et al., 1998) followed by  
477 visualizing HVEM with anti-rabbit AF488 (Life Technologies; 1:200). The size of the  
478 epidermal samples mostly allowed only the analysis of nectin-1 expression. For nectin-1, mouse  
479 IgG1 (Life Technologies, 1:20) and for HVEM, rabbit IgG, polyclonal (Abcam, 1:20) were  
480 used as isotype controls.

481 Dermal samples and dermal sheets prepared from skin shaves were digested with whole skin  
482 dissociation kit (Miltenyi) for 2.5 hours shaking (180 rpm) at 37°C before filtering through 40  
483 µm cell strainers. Cell suspensions were incubated in PBS-5% FCS on ice for 30 min with  
484 mouse anti-nectin-1 (CK41; 1:100) (Krummenacher et al., 2000), or with anti-HVEM-PE  
485 (Miltenyi, CD270-PE, REA247; 1:11) for 10 min at 4°C. Nectin-1 was visualized with anti-  
486 mouse IgG-Cy5 (Jackson Immunoresearch Laboratories Inc.; 1:100). Because of the limited  
487 cell number prepared from dermal samples, only nectin-1 expression was analyzed in most  
488 samples. For nectin-1, mouse IgG1 (Life Technologies; 1:20) and for HVEM, PE-labelled  
489 recombinant human IgG1, (Miltenyi; REA293-PE; 1:50) were used as isotype controls.  
490 Staining with DAPI for 1 min prior to analysis allowed the gating of only viable cells. Samples  
491 were analyzed by using a FACSCanto II flow cytometer and FACSDiva (version 6.1.3, BD)  
492 and FlowJo (version 7.6.3, Tree Star) software.

493

#### 494 **Acknowledgments**

495 We thank Roger Everett for ICP0 antibodies, Claude Krummenacher for nectin-1 antibodies  
496 (CK41), Matthias Rübsam and Sara Wickström for critical reading of the manuscript, Christian  
497 Jüngst/CECAD Imaging facility for help with SHG microscopy. Additional thanks go to Just  
498 Vlak and Adelheid Elbe-Bürger for discussion.

499 This research was supported by the Deutsche Forschungsgemeinschaft (SFB829 Z4 project,  
500 KN536/16-3 to DKM, SFB829 stipend to NDLC), the Köln Fortune Program/Faculty of  
501 Medicine, University of Cologne, and the Maria-Pesch foundation.

502 **References**

503 Boutell C, Everett RD. Regulation of alphaherpesvirus infections by the ICP0 family of  
504 proteins. *J Gen Virol* 2013;94:465-81.

505

506 Connolly SA, Jardetzky TS, Longnecker R. The structural basis of herpesvirus entry. *Nat Rev*  
507 *Microbiol* 2021;19:110–121.

508

509 Do NN, Willenborg S, Eckes B, Jüngst C, Sengle G, Zaucke F, Eming SA. Myeloid Cell-  
510 Restricted STAT3 Signaling Controls a Cell-Autonomous Antifibrotic Repair Program. *J*  
511 *Immunol* 2018;201:663-74.

512

513 Everett RD, Cross A, Orr A. A truncated form of herpes simplex virus type 1 immediate-early  
514 protein Vmw110 is expressed in a cell type dependent manner. *Virology* 1993;197:751-6.

515

516 Heldwein EE, Krummenacher C. Entry of herpesviruses into mammalian cells. *Cell Mol Life*  
517 *Sci* 2008;65:1653-68.

518

519 Geraghty RJ, Krummenacher C, Cohen GH, Eisenberg RJ, Spear PG. Entry of  
520 alphaherpesviruses mediated by poliovirus receptor-related protein 1 and poliovirus receptor.  
521 *Science* 1998;280:1618-20.

522

523 Krummenacher C, Baribaud I, Ponce de Leon M, Whitbeck JC, Lou H, Cohen GH, Eisenberg  
524 RJ. Localization of a binding site for herpes simplex virus glycoprotein D on herpesvirus entry  
525 mediator C by using antireceptor monoclonal antibodies. *J Virol* 2000;74:10863-72.

526

527 Lopez P, Van Sant C, Roizman B. Requirements for the nuclear-cytoplasmic translocation of  
528 infected-cell protein 0 of herpes simplex virus 1. *J Virol* 2001;75:3832–40.

529

530 Montgomery RI, Warner MS, Lum BJ, Spear PG. Herpes simplex virus-1 entry into cells  
531 mediated by a novel member of the TNF/NGF receptor family. *Cell* 1996;87:427-36.

532

533 Petermann P, Haase I, Knebel-Mörsdorf D. Impact of Rac1 and Cdc42 signaling during early  
534 herpes simplex virus type 1 infection of keratinocytes. *J Virol* 2009; 83:9759-72.

535 Petermann P, Thier K, Rahn E, Rixon FJ, Bloch W, Özcelik S, Krummenacher C, Barron MJ,  
536 Dixon MJ, Scheu S, Pfeffer K, Knebel-Mörsdorf D. Entry mechanisms of herpes simplex virus  
537 1 into murine epidermis: involvement of nectin-1 and herpesvirus entry mediator as cellular  
538 receptors. *J Virol* 2015;89:262-74.  
539  
540 Rahn E, Thier K, Petermann P, Knebel-Mörsdorf D. Ex Vivo Infection of Murine Epidermis  
541 with Herpes Simplex Virus Type 1. *J Vis Exp* 2015a; 24:e53046.  
542  
543 Rahn E, Petermann P, Thier K Bloch W, Morgner, J, Wickström SA, Knebel-Mörsdorf D.  
544 Invasion of Herpes Simplex Virus Type 1 into Murine Epidermis: An Ex Vivo Infection Study.  
545 *J Invest Dermatol* 2015b;135:3009-16.  
546  
547 Rahn E, Thier K, Petermann P, Rübsam M, Staeheli P, Iden S, Niessen CM, Knebel-Mörsdorf  
548 D. Epithelial Barriers in Murine Skin during Herpes Simplex Virus 1 Infection: The Role of  
549 Tight Junction Formation. *J Invest Dermatol* 2017;137:884-93  
550  
551 Schelhaas M, Jansen M, Haase I, Knebel-Mörsdorf D. Herpes simplex virus type 1 exhibits a  
552 tropism for basal entry in polarized epithelial cells. *J Gen Virol* 2003;84:2473-84.  
553  
554 Simpson CL, Patel DM, Green KJ. Deconstructing the skin: cytoarchitectural determinants of  
555 epidermal morphogenesis. *Nat Rev Mol Cell Biol* 2011;12:565-80.  
556  
557 Tajpara P, Mildner M, Schmidt R, Vierhapper M, Matiasek J, Popow-Kraupp T, et al. A  
558 Preclinical Model for Studying Herpes Simplex Virus Infection. *J Invest Dermatol*  
559 2019;139:673-82.  
560  
561 Thier K, Petermann P, Rahn E, Rothamel D, Bloch W, Knebel-Mörsdorf D. Mechanical barriers  
562 restrict invasion of herpes simplex virus 1 into human oral mucosa. *J Virol* 2017;91:e01295-  
563 17.  
564  
565 Thomas ML. The leukocyte common antigen family. *Ann Rev Immunol* 1989;7:339-69.  
566

567 Wirtz L, Möckel M, Knebel-Mörsdorf D. Invasion of Herpes Simplex Virus 1 into Murine  
568 Dermis: Role of Nectin-1 and Herpesvirus Entry Mediator as Cellular Receptors during Aging.  
569 J Virol 2020;94:e02046-19.
